# Supplementary material for: Fabrication of porous polymer coating layers with selective wettability on filter papers via the breath figure method and their applications in oil/water separation
Source: Royal Society of Chemistry journal article supplement (doi:10.1039/d1ra01080h), 2021-01-01
Supplement: d1ra01080h1.pdf [file d1ra01080h1.pdf]

---

## Fabrication of Porous Polymer Coating Layers with Selective Wettability on Filter Papers via Breath Figure Method and Their Applications in Oil/Water Separation

Xu Zhang<sup>a,c</sup>, Guangping Sun<sup>\*a</sup>, Heng Liu<sup>\*b</sup>, Xuequan Zhang<sup>b</sup>

a. College of Materials Science and Engineering, Jilin University, Changchun 130022, People's Republic of China E-mail: [sungp@jlu.edu.cn](mailto:sungp@jlu.edu.cn)

b. Key Laboratory of Rubber-Plastics, Ministry of Education/ Shandong Provincial Key Laboratory of Rubber-Plastics, Qingdao University of Science & Technology, Qingdao 266061, People's Republic of China E-mail: [hengliu@qust.edu.cn](mailto:hengliu@qust.edu.cn)

c. College of Materials Science and Engineering, Jilin Jianzhu University, Changchun 130021, People's Republic of China E-mail: [xzhang@ciac.ac.cn](mailto:xzhang@ciac.ac.cn)

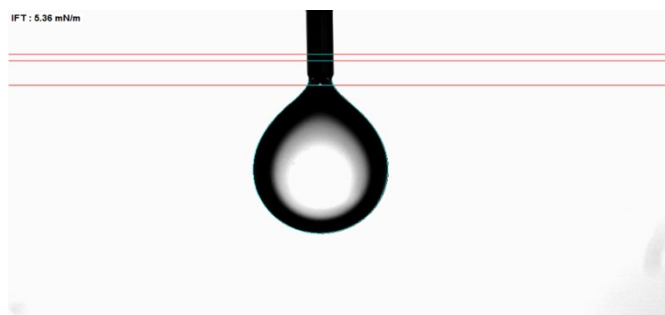

**Figure 1.** The polymer solution droplets profile in the measurement of liquid interfacial tension between the PBTF-30 dichloromethane solution and water by hanging drop method.

The result was calculated by digital image processing with OWRK method, and the interfacial tension between the PBTF-30 DCM solution and water is measured as  $5.36 \text{ mN}\cdot\text{m}^{-1}$ .

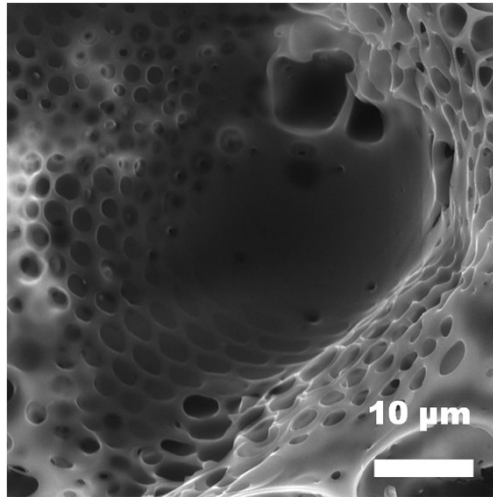

**Figure 2.** SEM image of deep furrow covered by honeycomb coating layers of PBTF-30 (15 mg/mL).

The interfacial energy balance  $z_0$  is defined as:

$$z_0 = z/R = (\gamma_w - \gamma_{w/s}) / \gamma_s \quad \text{Equation S1}$$

Where  $z$  is the distance between the droplet center and the air/solution interface;  $R$  is the droplet radius;  $\gamma_{w/s}$  is the interfacial tension between water and solution;  $\gamma_w$  and  $\gamma_s$  are the surface tension of the water and the solution, respectively. When  $-1 < z_0 < 1$ , one layer of droplets stayed between the air and solution interface, forming monolayer ordered structures. When  $z_0 > 1$ , the droplets immerse into the solution, forming multilayer films. When  $z_0 < -1$ , water droplets could not remain at the interface or in the solution, so no ordered structure could be obtained.

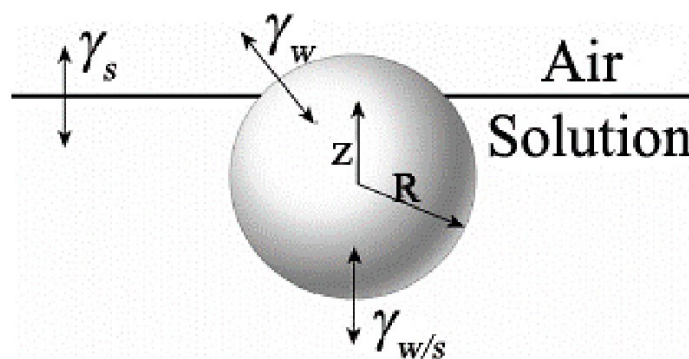

**Figure S3.** Schematic view of a spherical water droplet at the air/solution interface, with copyright permission from references <sup>36</sup>.  $\gamma_s$  and  $\gamma_w$  the surface tension of solution and water, respectively;  $\gamma_{w/s}$  the interfacial tension between water and the solution;  $z$ , the distance between the water droplet center and surface;  $R$ , the radius of the spherical water droplet.

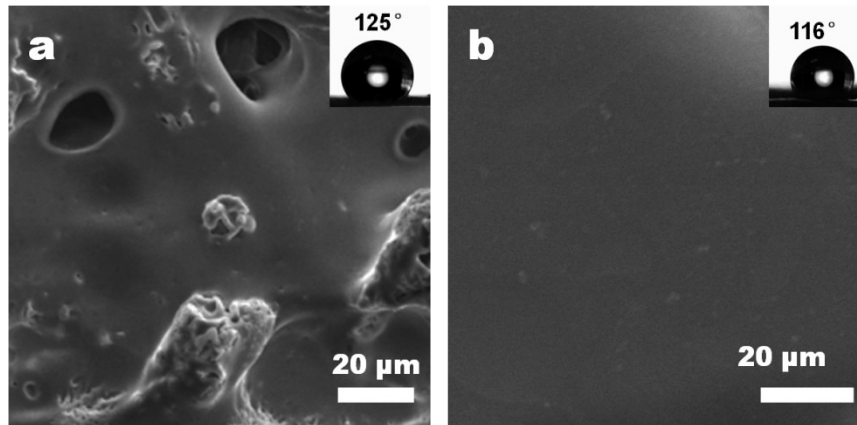

**Figure S4.** SEM images of the coating layers formed by PBTP-30 by spin coating method on (a) filter paper; (b) planar glass slide in the concentrations of 15 mg/mL.

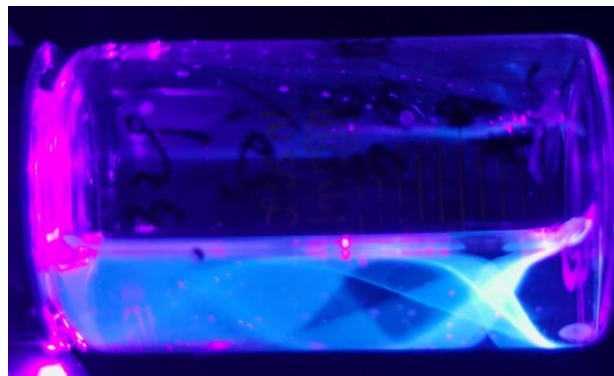

**Figure S5.** The strong Tyndall effect displayed by N-50 under the 405 nm ultraviolet light.

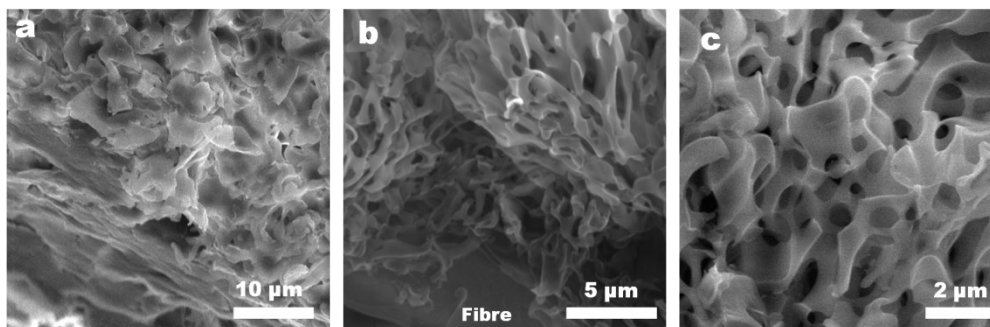

**Figure S6.** SEM images of the coating layers by N-50 (5 mL, 10 mg/mL) with 2 μL water (a) shear damaged polymeric coating layer; (b) coating layers in situ formed on fiber; (c) High magnification SEM image of the communicating pores.

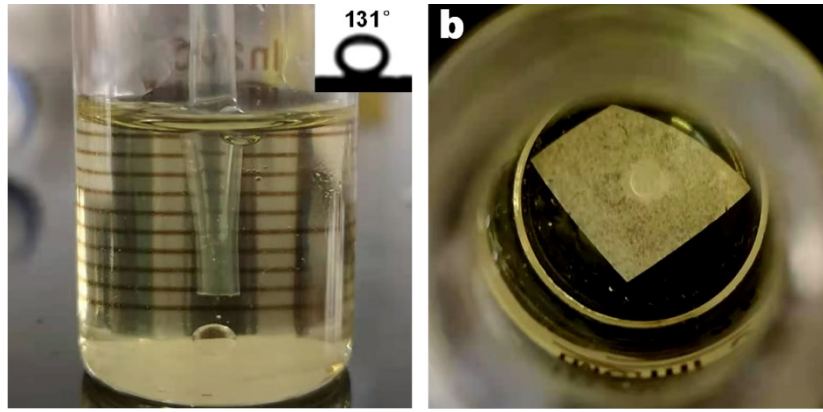

**Figure S7.** Water droplet contact statue under the oil phase of the N-50 coated filter paper (petroleum ether was employed as oil phase and was dyed into yellow), digital photographs of (a) the side view;(b) the top view.

The Flux ( $F$ ) of petrol ether /water mixture was assessed by measuring the time spent in collecting the permeated oil, and calculated by Equation 2.

$$F = \frac{V}{St} \quad \text{Equation (2).}$$

Where  $V$  is the volume of the petrol ether,  $S$  represents the effective surface area of superhydrophobic composite, and  $t$  is the time, which is 60s (The video of the filtration process can be found in supporting information Video 2). The effective surface area  $S$  is in dynamic changing as the filtration proceeding. The initial  $S$  is  $2.49\text{cm}^2$  and the final  $S$  is  $0\text{ cm}^2$  since the  $F$  is a constant, the value of  $S$  is averaging as  $1.2445\text{ cm}^2$  and applied in  $F$  calculate. The value of  $F$  as calculated is  $2989.15\text{Lm}^{-2}\text{ h}^{-1}$ .
